# Supplementary material for: Molecular Basis for Modulation of the p53 Target Selectivity by KLF4
Source: PubMed Central journal article supplement (PMC3484126; doi:10.1371/journal.pone.0048252), 2012-10-30
Supplement: pone.0048252.s010.pdf [file pone.0048252.s010.pdf]

**Table S2: DNA-binding affinities of KLF4 determined by fluorescence anisotropy titrations.**

| DNA  | KLF4 construct | Ionic strength / mM | $K_d \pm SD$ / nM |
|------|----------------|---------------------|-------------------|
| *K-1 | FL             | 210                 | $0.7 \pm 0.2$     |
|      | FL             | 285                 | $4 \pm 0.6$       |
|      | FL             | 360                 | $44 \pm 4$        |
|      | 179-479        | 285                 | $3 \pm 1$         |
|      | 271-479        | 285                 | $2 \pm 0.4$       |
|      | 391-479        | 285                 | $2 \pm 0.4$       |
| *K-2 | FL             | 210                 | $85 \pm 14$       |
| *P   | FL             | 210                 | >1000             |
