# Supplementary material for: Molecular Basis for Modulation of the p53 Target Selectivity by KLF4
Source: PubMed Central journal article supplement (PMC3484126; doi:10.1371/journal.pone.0048252), 2012-10-30
Supplement: pone.0048252.s011.pdf [file pone.0048252.s011.pdf]

**Table S3: Chemical shifts for KLF4 367-479 in NMR buffer. Signals for residues K380, S387, W388, R390, K391, T408, S410, S411, R454, S466, and D469 were either missing or could not unambiguously assigned. Eight proline residues were not visible with the pulse sequences used (P370, 371, 376, 379, 381, 389, 425, and 455).**

| Residue | C <sub>α</sub> | C <sub>α</sub> p | C <sub>β</sub> | C <sub>β</sub> p | C(O)  | C(O)p | H(N)  | N     |
|---------|----------------|------------------|----------------|------------------|-------|-------|-------|-------|
| E367    | 54.18          | 55.92            | 27.3           | 61.11            | 173.5 | 171.9 | 8.545 | 122.9 |
| L368    | 52.45          | 54.14            | 39.62          | 27.31            | 174.3 | 173.5 | 8.127 | 122.8 |
| M369    | 50.31          | 52.43            | 29.8           | 39.61            | 170.9 | 174.3 | 8.168 | 122.4 |
| G372    | 42.61          | 60.76            | -              | 29.3             | 171.7 | 174.9 | 8.484 | 109.8 |
| S373    | 56.05          | 42.63            | 61.42          | -                | 171.5 | 171.7 | 8.01  | 115.2 |
| C374    | 55.69          | 55.93            | 25.55          | 61.4             | 171.5 | 171.5 | 8.309 | 120.5 |
| M375    | 50.7           | 55.61            | 29.47          | 25.57            | 172.2 | 171.4 | 8.372 | 123.9 |
| E377    | 53.48          | 60.46            | 27.94          | 29.37            | 173.5 | 173.9 | 8.377 | 121.2 |
| E378    | 51.62          | 53.45            | 27.25          | 27.96            | 171.7 | 173.5 | 8.36  | 124.2 |
| K382    | 53.73          | 60.42            | 30.32          | 29.44            | 174   | 174.2 | 8.379 | 122   |
| R383    | 53.46          | 53.71            | 28.23          | 30.34            | 174   | 174   | 8.296 | 122   |
| G384    | 42.5           | 53.5             | -              | 28.14            | 171.2 | 174   | 8.391 | 110.3 |
| R385    | 53.49          | 42.44            | 28.15          | -                | 173.7 | 171.2 | 8.139 | 120.8 |
| R386    | 51.44          | 53.58            | 30.56          | 28.21            | -     | 173.7 | 8.3   | 122.9 |
| R392    | 53.42          | 60.54            | 28.2           | 29.35            | 173.6 | 174   | 8.318 | 121.6 |
| T393    | 59.12          | 53.44            | 67.25          | 28.2             | 171.2 | 173.6 | 8.138 | 116.3 |
| A394    | 49.81          | 59.14            | 16.7           | 67.22            | 174.1 | 171.2 | 8.332 | 127.2 |
| T395    | 58.66          | 49.66            | 67.69          | 16.79            | 170.8 | 174.1 | 7.74  | 112.3 |
| H396    | 52.9           | 58.66            | 28.68          | 67.76            | 172   | 170.8 | 8.429 | 123.3 |
| T397    | 59.22          | 52.78            | 68.06          | 28.69            | 170.4 | 171.9 | 8.577 | 121.1 |
| C398    | 59.12          | 59.13            | 27.69          | 68.08            | 173.1 | 170.4 | 8.982 | 129.4 |
| D399    | 51.27          | 59.14            | 38.29          | 27.64            | 173.4 | 173.1 | 8.532 | 128.8 |
| Y400    | 57.71          | 51.26            | 36.12          | 38.24            | 174.1 | 173.4 | 9.161 | 126.7 |
| A401    | 51.28          | 57.7             | 15.13          | 36.05            | 176   | 174.1 | 8.187 | 131.2 |
| G402    | 43.27          | 51.25            | -              | 15.21            | 171   | 176   | 8.742 | 111.1 |
| C403    | 58.41          | 43.1             | 26.87          | -                | 173.5 | 171   | 7.851 | 122.3 |
| G404    | 43.26          | 58.37            | -              | 26.9             | 171.8 | 173.5 | 8.333 | 105.1 |
| K405    | 55.49          | 43.24            | 30.39          | -                | 172.4 | 171.8 | 8     | 122.8 |
| T406    | 57.78          | 55.51            | 68.91          | 30.39            | 170   | 172.4 | 7.639 | 113.5 |
| Y407    | 54.91          | 57.79            | 41.14          | 68.88            | 173   | 170   | 8.71  | 120.8 |
| K409    | 51.84          | 60.22            | 32.76          | 66.84            | 174   | 172.1 | 7.18  | 118.2 |
| H412    | 54.25          | 58.78            | 28.81          | 58.8             | 175.5 | 174.9 | 6.697 | 122.5 |
| L413    | 55.18          | 54.27            | 37.61          | 28.81            | 174.9 | 175.5 | 7.007 | 121.3 |
| K414    | 57.59          | 55.09            | 29.44          | 37.61            | 176.3 | 174.8 | 8.254 | 118.8 |
| A415    | 52.25          | 57.57            | 15.32          | 29.44            | 177.4 | 176.3 | 7.312 | 119.4 |
| H416    | 56.36          | 52.23            | 25.36          | 15.29            | 175.8 | 177.4 | 7.52  | 118.7 |
| L417    | 55.94          | 56.45            | 39.1           | 25.29            | 176.5 | 175.8 | 8.785 | 122   |
| R418    | 55.68          | 55.88            | 27.33          | 39.09            | 175.5 | 176.5 | 6.995 | 115.7 |
| T419    | 61.08          | 55.67            | 66.43          | 27.35            | 172.7 | 175.5 | 7.694 | 109.7 |
| H420    | 52.45          | 61.02            | 25.16          | 66.48            | 172.7 | 172.7 | 6.87  | 119   |
| T421    | 59.14          | 52.38            | 67.45          | 25.18            | 172.1 | 172.7 | 7.599 | 112.3 |
| G422    | 42.35          | 59.04            | -              | 67.43            | 171.2 | 172.1 | 8.156 | 110.1 |
| E423    | 54.76          | 42.35            | 27.71          | -                | 173.9 | 171.2 | 8.121 | 119.6 |
| K424    | 51.26          | 54.71            | 31.11          | 27.73            | 171.1 | 173.9 | 8.241 | 120.6 |
| Y426    | 55.09          | 60.91            | 35.37          | 29.66            | 171.9 | 173.6 | 7.97  | 118.6 |
| H427    | 51.81          | 55.16            | 29.7           | 35.39            | 171.6 | 171.9 | 9.012 | 125.1 |
| C428    | 59.28          | 51.76            | 27.56          | 29.6             | 174   | 171.6 | 8.773 | 126   |
| D429    | 51.14          | 59.22            | 38.4           | 27.48            | 173.8 | 174   | 8.767 | 130.2 |
| W430    | 56.37          | 51.19            | 27.12          | 38.32            | 174.4 | 173.8 | 9.472 | 127.9 |
| D431    | 53.95          | 56.37            | 38.03          | 27.11            | 174.4 | 174.4 | 7.81  | 129.5 |
| G432    | 43.2           | 53.88            | -              | 37.94            | 171.3 | 174.4 | 8.776 | 113.4 |
| C433    | 58.8           | 43.1             | 27.57          | -                | 173.7 | 171.3 | 8.003 | 123   |
| G434    | 43.17          | 58.71            | -              | 27.63            | 172.4 | 173.7 | 8.869 | 107.5 |
| W435    | 57.55          | 43.2             | 26.56          | -                | 172.4 | 172.4 | 8.494 | 122.7 |
| K436    | 52.13          | 57.57            | 33.32          | 26.59            | 171.8 | 172.4 | 7.531 | 119.3 |
| F437    | 54.74          | 52.15            | 41.37          | 33.24            | 172   | 171.7 | 8.88  | 116.2 |
| A438    | 51.55          | 54.76            | 17.66          | 41.31            | 174.8 | 172   | 9.27  | 123.3 |
| R439    | 51.26          | 51.55            | 31.88          | 17.72            | 174.2 | 174.8 | 7.691 | 113.2 |
| S440    | 58.49          | 51.27            | 59.3           | 31.81            | 174.2 | 174.3 | 8.555 | 120.2 |
| D441    | 53.7           | 58.4             | 36.9           | 59.39            | 175.7 | 174.3 | 8.532 | 119.6 |
| E442    | 55.7           | 53.7             | 27.5           | 36.93            | 176.3 | 175.7 | 6.833 | 119   |
| L443    | 55.17          | 55.6             | 37.21          | 27.35            | 174.7 | 176.3 | 6.732 | 120.9 |
| T444    | 64.05          | 55.13            | 65.52          | 37.22            | 174.1 | 174.8 | 8.1   | 115   |
| R445    | 57.1           | 64.17            | 27.66          | 65.5             | 176   | 174.1 | 7.43  | 120.1 |
| H446    | 56.41          | 57.07            | 26.08          | 27.62            | 173.7 | 176   | 7.488 | 119.6 |
| Y447    | 58.93          | 56.35            | 35.97          | 26.13            | 174.7 | 173.7 | 8.657 | 119.5 |
| R448    | 55.23          | 58.93            | 27.38          | 35.93            | 175.4 | 174.7 | 7.059 | 114.8 |
| K449    | 55.08          | 55.13            | 28.66          | 27.35            | 175.2 | 175.4 | 7.526 | 117.4 |
| H450    | 52.9           | 55.07            | 24.05          | 28.55            | 172.8 | 175.2 | 6.899 | 115.4 |
| T451    | 58.95          | 52.9             | 66.8           | 24.07            | 171.7 | 172.8 | 7.183 | 108.8 |
| G452    | 42.53          | 58.79            | -              | 66.71            | 171   | 171.7 | 7.986 | 110.8 |
| H453    | 53.82          | 42.51            | 28.48          | -                | 172.6 | 171   | 8.066 | 120.4 |
| F456    | 54.73          | 60.87            | 35.6           | 29.48            | 171.8 | 173.8 | 7.946 | 118.4 |
| Q457    | 52.21          | 54.71            | 28.27          | 35.61            | 172.2 | 171.8 | 8.371 | 125.4 |
| C458    | 58.45          | 52.22            | 26.71          | 28.28            | 173.7 | 172.2 | 8.882 | 129.4 |
| Q459    | 54.22          | 58.46            | 26.73          | 26.73            | 174   | 173.7 | 8.981 | 126.1 |
| K460    | 53.71          | 54.24            | 30.46          | 26.73            | 173   | 174   | 9.739 | 122.1 |
| C461    | 55.94          | 53.57            | 27.8           | 30.44            | 170.3 | 173   | 8.005 | 120.1 |
| D462    | 52.41          | 55.85            | 37.95          | 27.79            | 174.1 | 170.4 | 7.986 | 115.2 |
| R463    | 54.54          | 52.33            | 28.46          | 37.97            | 170.8 | 174.1 | 8.367 | 123   |
| A464    | 47.7           | 54.51            | 19.77          | 28.41            | 173.2 | 170.8 | 7.501 | 121.6 |
| F465    | 54.69          | 47.63            | 41.4           | 19.8             | 172.8 | 173.2 | 8.571 | 116.3 |
| R467    | 51.41          | 57.62            | 32.09          | 61.82            | 173.8 | 171.1 | 7.082 | 117   |
| S468    | -              | 51.4             | 59.13          | 32.05            | -     | 173.8 | 8.461 | 119.9 |
| H470    | 54.51          | 53.41            | 28.85          | 35.61            | 175.3 | 176.1 | 6.971 | 120.5 |
| L471    | 54.94          | 54.48            | 37.52          | 28.83            | 174.5 | 175.3 | 6.887 | 120.4 |
| A472    | 52.85          | 54.98            | 15.02          | 37.46            | 178   | 174.5 | 7.824 | 121.1 |
| L473    | 54.97          | 52.83            | 39.25          | 15               | 176.8 | 178   | 7.447 | 117.8 |
| H474    | 56.42          | 54.97            | 25.95          | 39.23            | 174.1 | 176.8 | 7.414 | 119.7 |
| M475    | 54.4           | 56.4             | 27.68          | 25.89            | 175.8 | 174.1 | 8.221 | 115.4 |
| K476    | 55.86          | 54.42            | 29.34          | 27.59            | 175.2 | 175.8 | 7.144 | 117.7 |
| R477    | 53.54          | 55.85            | 26.6           | 29.35            | 173.9 | 175.2 | 7.639 | 116.1 |
| H478    | 52.9           | 53.54            | 26.54          | 26.48            | 171.1 | 173.9 | 7.35  | 117.6 |
| F479    | 56.36          | 52.9             | 37.33          | 26.48            | 177.8 | 171.1 | 7.458 | 126   |
