# Supplementary material for: Molecular Basis for Modulation of the p53 Target Selectivity by KLF4
Source: PubMed Central journal article supplement (PMC3484126; doi:10.1371/journal.pone.0048252), 2012-10-30
Supplement: pone.0048252.s012.pdf [file pone.0048252.s012.pdf]

**Table S4: Results for cooperative binding assay. p53-DNA binding affinities measured by fluorescence anisotropy titrations. FA buffer of indicated ionic strength was used.**

| <b>DNA</b> | <b>Ionic strength / mM</b> | <b>Protein</b> | <b><i>c</i> / nM</b> | <b><i>K<sub>d</sub></i> / nM</b> |
|------------|----------------------------|----------------|----------------------|----------------------------------|
| *P88C      | 160                        | CP2            | 0                    | 6.9                              |
|            |                            |                | 400                  | 15                               |
|            |                            |                | 1500                 | 5.6                              |
| *P88H      | 210                        | HSF1           | 0                    | 5.1                              |
|            |                            |                | 400                  | 15                               |
|            |                            |                | 1500                 | 32                               |
|            |                            |                | 5000                 | 21                               |
| *P88Y      | 210                        | YY1            | 0                    | 4.2                              |
|            |                            |                | 1500                 | 4.2                              |
|            |                            |                | 5000                 | 4.5                              |
