# Supplementary material for: Molecular Basis for Modulation of the p53 Target Selectivity by KLF4
Source: PubMed Central journal article supplement (PMC3484126; doi:10.1371/journal.pone.0048252), 2012-10-30
Supplement: pone.0048252.s013.pdf [file pone.0048252.s013.pdf]

**Table S5: Results of fluorescence anisotropy titrations for DNA binding affinities of p53 in dependence of added KLF4 and spacing base pairs. FA 210 buffer was used.**

| <b>DNA</b> | <b><i>c</i> (KLF4) / nM</b> | <b><math>K_d \pm SD</math> / nM</b> |
|------------|-----------------------------|-------------------------------------|
| *PK        | 0                           | $3.7 \pm 0.4$                       |
|            | 400                         | $2.8 \pm 0.3$                       |
| *P5K       | 0                           | $4.6 \pm 0.6$                       |
|            | 400                         | $2.5 \pm 0.9$                       |
| *P10K      | 0                           | $5.1 \pm 1.3$                       |
|            | 400                         | $2.4 \pm 0.6$                       |
| *P30K      | 0                           | $11 \pm 1.6$                        |
|            | 400                         | $2.9 \pm 0.0$                       |
