# Supplementary material for: Molecular Basis for Modulation of the p53 Target Selectivity by KLF4
Source: PLoS One. 2012 Oct 30;7(10):e48252. doi: 10.1371/journal.pone.0048252 (PMC3484126; doi:10.1371/journal.pone.0048252)
Supplement: Table S1 — Fluorescently labelled DNA. (PDF) [file pone.0048252.s009.pdf]

Table S1: Fluorescently labelled DNA. \*denotes the label (X = fluorescein, Y = Alexa488), *P* if a p53RE (bold letters) is present, *n* the spacer length, and *K* if a Klf4RE (italic letters) is present. Non-canonical three quarter-sites are highlighted in green for the constructs \*108K and \*47K. The affinity-defining bases C4, G7, C14 and G17 are underlined and changes to the canonical bases indicated in red.
